# Supplementary material for: Overburdened ferroptotic stress impairs tooth morphogenesis
Source: eLife. 2023 Nov 22;12:RP88745. doi: 10.7554/eLife.88745 (PMC10665014; doi:10.7554/eLife.88745)
Supplement: Figure 1—source data 1. [file elife-88745-fig1-data1.xlsx]

## Sheet: GPX4 expression
	EPI			MES			TOTAL
E13.5	1.20119	1.29485	1.47243	0.898634	0.749432	0.906195	1.01092	0.945496	1.04358
E15.5	1.40682	1.40772	1.48245	1.06179	0.99932	1.18138	1.27168	1.22928	1.36776
E17.5	1.64739	1.6156	1.73779	1.02715	0.990223	1.08945	1.38479	1.28696	1.4663
P1	1.4097	1.70678	1.51046	0.87109	0.731773	0.772055	1.1729	1.08072	0.982025
P3	0.867285	0.86552	0.916837	0.715089	0.818983	0.871577	0.783304	0.848949	0.91132
