# Supplementary material for: Overburdened ferroptotic stress impairs tooth morphogenesis
Source: eLife. 2023 Nov 22;12:RP88745. doi: 10.7554/eLife.88745 (PMC10665014; doi:10.7554/eLife.88745)
Supplement: Figure 3—source data 1. [file elife-88745-fig3-data1.xlsx]

## Sheet: Mito Scale
Ctrl	Era10μM
5357	1852
3593	3912
3115	2026
4553	1512
3837	1328
5253	1030
4893	1658
3988	2010
2867	2447
4550	2604
3193	1968
3484	2374
3650	4561
4022	1526
3875	1022
2682	1138
2572	3192
4110	1726
2101	2780
6495	2484
4494	1370
3611	1410
4601	2067
2304	891
3893	1844
7315	1377
3306	2092
2078	4642
1064	3426
1180	1296
6865	4400
3558	1688
3410	3292
3189	3276
5036	1194
5704	2958
2102	1262
1907	2932
3472	2022
3780	1861
1974	1326
5106	2106
6362	1594
2792	2550
2776	1385
2331	2892
4266	1757
2195	2768
3000	1176
1410	2636
4363	3014
5854	4729
7250	6134
2119	2504
2072	3406
2402	5046
3424	3284
2530	6110
2360	3805
3446	1545
1463	3422
3015	4702
1498	2687
1672	5865
7159	2792
3016	2493
3459	2871
2930	2723
1592	2718
3302	2595
4662	2128
4046	9845
3398	3257
2178	2850
4196	5010
3730	3760
3229	2641
5227	2134
3078	5391
2847	4340
2150	3448
3328	3179
2835	4254
7518	4540
4435	4256
1813	2517
2829	3142
2705	2553
1312	2754
6038	2457
1904	3344
2031	2473
2770	1420
3380	1812
1788	1409
3266	1094
2714
4494
3051
3544
4426
4743
6062
2460
1820
