# Supplementary material for: Overburdened ferroptotic stress impairs tooth morphogenesis
Source: eLife. 2023 Nov 22;12:RP88745. doi: 10.7554/eLife.88745 (PMC10665014; doi:10.7554/eLife.88745)
Supplement: Figure 3—source data 2. [file elife-88745-fig3-data2.xlsx]

## Sheet: Gene expression in D5
Normolized to Actb	CTRL			Era-10μM
Gpx4	0.97	1.03	1	1.02	1.36	1.19
Slc7a11	1.06	0.96	0.98	9.05	9.27	9.19
Ptgs2	1.12	1	0.89	32.61	34.73	33.3
