# Supplementary material for: Overburdened ferroptotic stress impairs tooth morphogenesis
Source: eLife. 2023 Nov 22;12:RP88745. doi: 10.7554/eLife.88745 (PMC10665014; doi:10.7554/eLife.88745)
Supplement: Figure 4—source data 1. [file elife-88745-fig4-data1.xlsx]

## Sheet: Percent of Necrosis like cells
	Era1.5μM			Era1.5μM&Fer-1			Era1.5μM&Lip-1			Era1.5μM&DFO
NLCD Frequency	15.58	14.73	14.73	4.19	3.88	3.46	5.82	6.31	5.93	9.5	9.87	10.6
