# Supplementary material for: Overburdened ferroptotic stress impairs tooth morphogenesis
Source: eLife. 2023 Nov 22;12:RP88745. doi: 10.7554/eLife.88745 (PMC10665014; doi:10.7554/eLife.88745)
Supplement: Figure 5—source data 1. [file elife-88745-fig5-data1.xlsx]

## Sheet: Sheet1
Era1.5μM	Era1.5μM&Fer-1
3625	2754
1018	3428
1436	2818
1517	2754
2701	2648
1250	3196
1248	6503
2421	4364
1166	4914
1010	1498
3144	7953
1676	3966
1386	2982
1738	5699
3482	3702
2570	6588
5157	4242
2502	8408
2042	5558
1816	5212
1551	3273
2504	3235
1590	3373
2016	2524
1982	4696
1848	7914
1426	5524
2452	5038
1222	4272
1628	3644
1630	3473
1638	6503
1954	5056
4088	2190
2042	2546
2956	3099
2278	2910
2258	2077
2704	793
2852	7468
2335	7560
3721	2415
2437	2514
1677	5648
3179	2893
3338	4352
1692	8778
866	6240
1391	4296
896	3712
4186	1676
3498	4134
2030	4118
1570	2867
2282	3822
1473	3656
1618	3489
1616	2678
3715	2672
1334	6058
3726	4314
2593	3629
2056	3334
3274	3069
1946	5073
2689	4430
3146	3245
9038	2836
3676	4995
2260	1954
2090	15011
2142	5445
1877	2016
2820	4488
1451
4626
1570
1248
1233
2439
2492
1545
1582
1926
2176
3610
2654
2594
2070
4754
3876
2751
3032
5684
2648
3059
3590
2380
1356
1868
2548
1412
1090
3254
4672
2644
1576
3105
1421
3500
540
1080
1552
2191
3272
